# Supplementary material for: Stacking effects in van der Waals heterostructures of blueP and Janus XYO (X = Ti, Zr, Hf: Y = S, Se) monolayers
Source: Royal Society of Chemistry journal article supplement (doi:10.1039/d0ra10827h), 2021-01-01
Supplement: d0ra10827h1.pdf [file d0ra10827h1.pdf]

Supplementary Material

**Stacking Effects in van der Waals Heterostructures of BlueP and  
Janus XYO (X=Ti, Zr, Hf; Y=S, Se) monolayers**

Qaisar Alam<sup>1</sup>, M. Idrees<sup>1</sup>, S. Muhammad<sup>1</sup>, Chuong V.

Nguyen<sup>2</sup>, M. Shafiq<sup>3</sup>, Y. Saeed<sup>3</sup>, H. U. Din<sup>3</sup>, B. Amin<sup>3\*</sup>

<sup>1</sup>*Department of Physics, Hazara University, Mansehra 21300, Pakistan,*

<sup>2</sup>*Department of Materials Science and Engineering,*

*Le Quy Don Technical University, Hanoi, Vietnam,*

<sup>3</sup>*Department of Physics, Abbottabad University  
of Science and Technology, Abbottabad, Pakistan.*

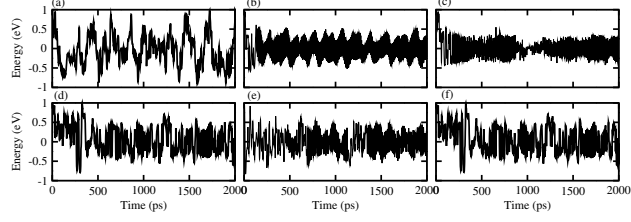

Fig.S 1: Thermal stabilities of strained (a) TiSO, (b) TiSeO, (c) ZrSO, (d) ZrSeO, (e) HfSO, and (f) HfSeO,

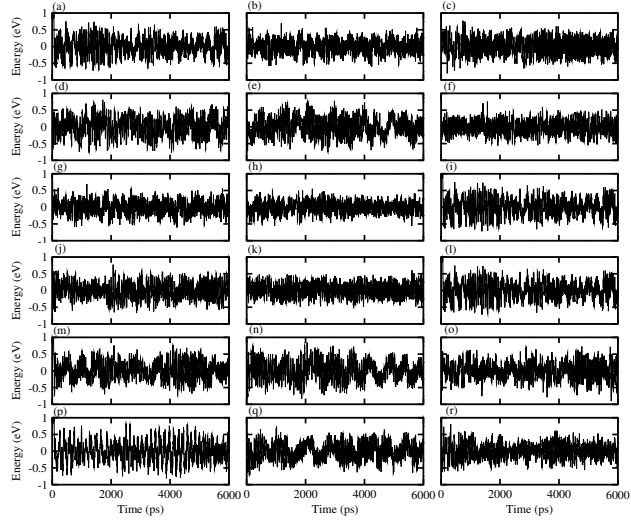

Fig.S 2: Thermal stabilities of blueP-TiSO ((a)-(c)), blueP-TiSeO ((d)-(f)), blueP-ZrSO ((g)-(i)), blueP-ZrSeO ((j)-(l)), blueP-HfSO ((m)-(o)), and blueP-HfSeO ((p)-(r)), where first column is for stacking-I, second column is for stacking-II and third column is for stacking-III of the corresponding vdW heterostructures

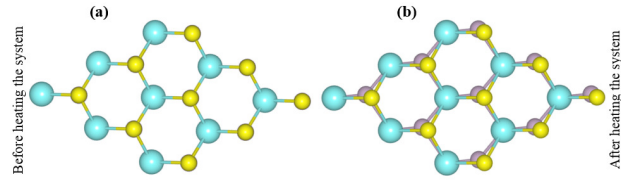

Fig.S 3: The atomic structure of the TiSeO monolayer (a) before and (b) after heating 6 ps, with no structure distortion.

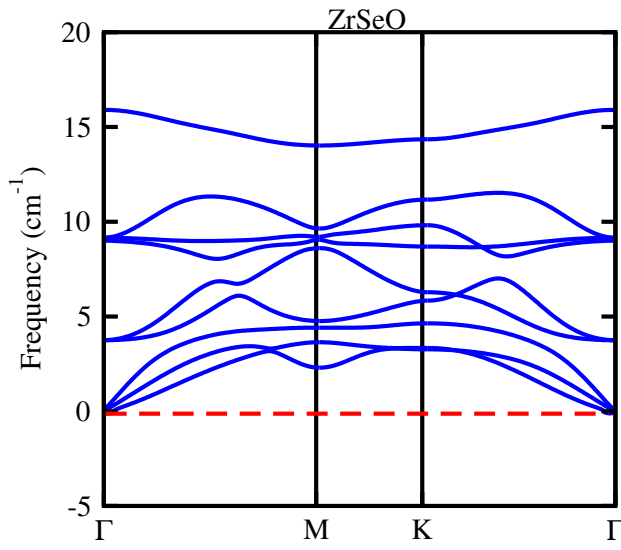

Fig.S 4: Phonon spectrum for 10% tensile strained ZrSSe.

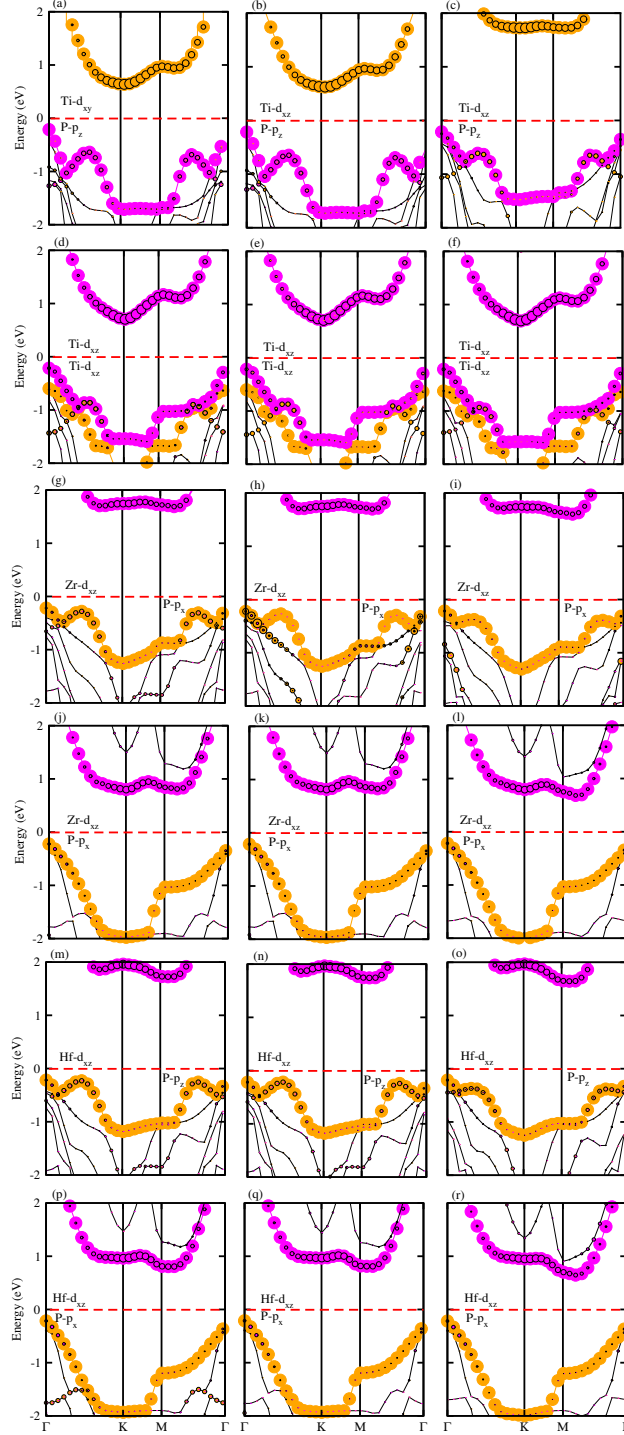

Fig.S 5: Weighted band structure of blueP-TiSO ((a)-(c)), blueP-TiSeO ((d)-(f)), blueP-ZrSO ((g)-(i)), blueP-ZrSeO ((j)-(l)), blueP-HfSO ((m)-(o)), and blueP-HfSeO ((p)-(r)), where first column is for stacking-I, second column is for stacking-II and third column is for stacking-III of the corresponding vdW heterostructures

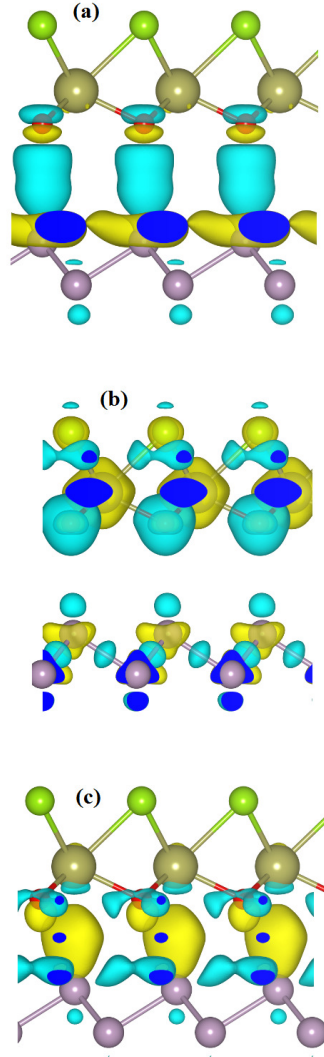

Fig.S 6: Charge density difference of the blueP-TiSO vdW heterostructure (for all three stackings), where the isovalue chosen to plot the isosurface is  $0.001 \text{ eV \AA}^{-3}$

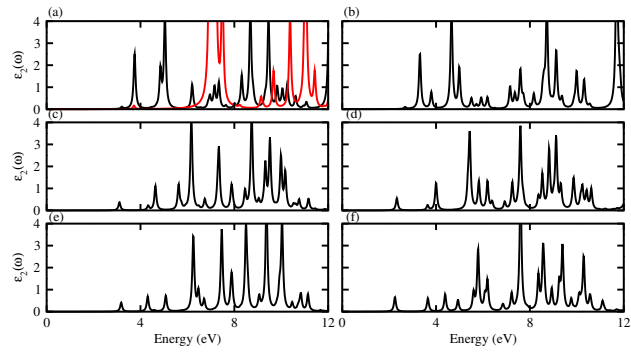

Fig.S 7: Imaginary part of dielectric function of (a) TiSO, (b) TiSeO, (c) ZrSO, (d) ZrSeO, (e) HfSO, and (f) HfSeO

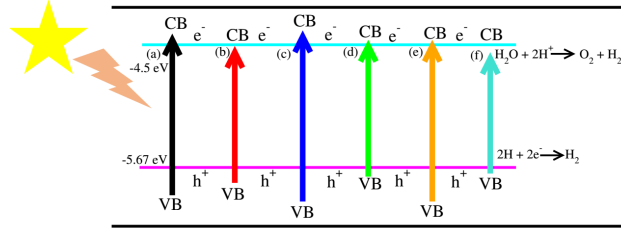

Fig.S 8: Valence band ( $E_{VB}$ ) and conduction band ( $E_{CB}$ ) edge alignment of (a) TiSO, (b) TiSeO, (c) ZrSO, (d) ZrSeO, (e) HfSO, and (f) HfSeO. The standard oxidation (-5.67 eV) and reduction (-4.44 eV) potentials for water splitting into  $O_2 = H_2O$  and  $H^+ = H_2$ , respectively
